# Supplementary material for: Beneficial Modulation of Lipid Mediator Biosynthesis in Innate Immune Cells by Antirheumatic Tripterygium wilfordii Glycosides
Source: MDPI journal article supplement (doi:10.3390/biom11050746), 2021-05-17
Supplement: s1 [file s1]

**Favorable modulation of lipid mediator biosynthesis in innate immune cells by  
antirheumatic *Tripterygium wilfordii* glycosides**

Kehong Zhang<sup>1,2,§</sup>, Simona Pace<sup>1,§</sup>, Paul M. Jordan<sup>1</sup>, Lukas Klaus Peltner<sup>1</sup>, Alexander Weber<sup>3</sup>,  
Dagmar Fischer<sup>3</sup>, Robert Klaus Hofstetter<sup>1</sup>, Xinchun Chen<sup>2</sup>, Oliver Werz<sup>1,\*</sup>

<sup>1</sup>Department of Pharmaceutical/Medicinal Chemistry, Institute of Pharmacy, Friedrich-Schiller-University, Philosophenweg 14, D-07743 Jena, Germany.

<sup>2</sup>Guangdong Provincial Key Laboratory of Regional Immunity and Diseases, Department of Pathogen Biology, Shenzhen University School of Medicine, Shenzhen 518000, China.

<sup>3</sup>Department of Chemistry and Pharmacy, Pharmaceutical Technology, Friedrich-Alexander-Universität Erlangen-Nürnberg, Cauerstrasse 4, 91058 Erlangen, Germany.

**Supplemental Material**

## Supplementary Figure S1

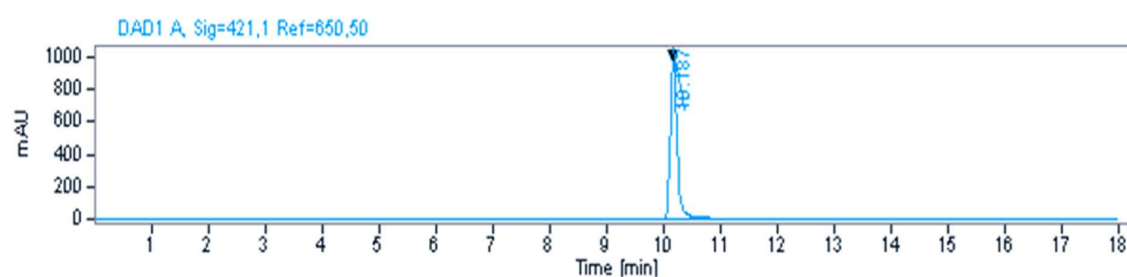

(A)

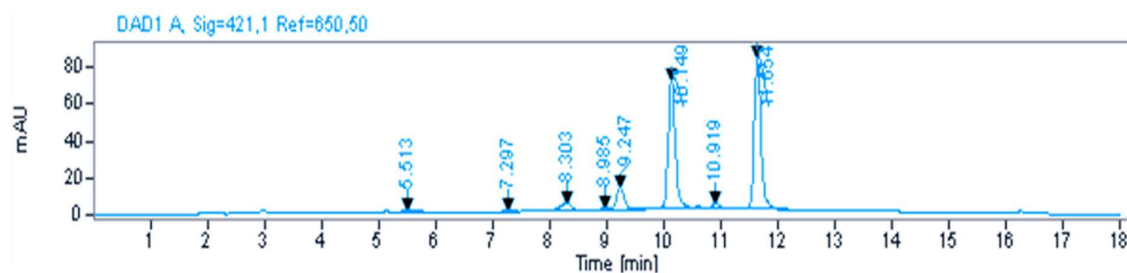

(B)

**Figure S1 RP-HPLC Chromatograms of TWG and determination of celastrol**

Chromatogram of celastrol reference substance (A) and of TWG (B) at 421 nm VIS detection. Under optimized conditions retention times of  $10.168 \pm 0.02$  min for celastrol could be realized.
